# Supplementary material
Source: publisher figshare collection journal article supplement (https://tandf.figshare.com/ndownloader/files/13209014)
Supplement: Supplementary file 1 [file 13209014]

**Supporting Information**

**Brønsted Acid Promoted Intramolecular Cyclization of *O*- Alkynyl benzoic acids: Concise Total Synthesis of Exserolide F**

Mohan Dumpala, Lingaswamy Kadari and Palakodety Radha Krishna*

*D-211, Discovery Laboratory, Organic & Biomolecular Chemistry Division*

*CSIR-Indian Institute of Chemical Technology, Hyderabad 500007, India.*

E-mail: prkgenius@iict.res.in

**List of Contents**

1. General experimental procedure S2
2. Experimental procedure S3
3. Copies of 1H NMR and 13C NMR spectra S9
4. LCMS of compound **4a**  S19
5. References S20

**General experimental procedure**

Dried organic solvents were used (anh. Na2SO4). Air sensitive reagents were transferred by double-ended needle. TLC: *Merck 60 F254* silica-gel plates. All column chromatographic separations were performed using silica gel (*Acme’s*, 60-120, 100-200 mesh). Yields refer to chromatographically and spectroscopically (1H- and 13C-NMR) homogenous material. 1H-NMR spectra were measured on 300 MHz, 400 MHz, and 500 MHz,instruments, and 13C-NMR spectra on 50 MHz, 75 MHz and 125 MHz) spectrometer in CDCl3/Acetone D6 (7-10 mM soln), TMS as internal standard. *J* values are given in Hz. All 1H and 13C chemical shifts are reported in ppm (δ). Infrared (IR) spectra were recorded on a Thermo Nicolet Nexus 670 spectrometer. Optical rotations were measured with a JASCO P-1020 instrument and [a]D values were in units of 10-1deg cm2 g-1 at 25 oC. Mass spectra were recorded on *Finnigan Mat 1210* double focusing mass spectrometer operating at a direct inlet system and ESI-MS was measured using ion-trap mass spectrometer.

**Experimental procedure**

**(*S*)-3-(Benzyloxy)hexan-1-ol (5)**

(4*S*)-2-phenyl-4-propyl-1,3-dioxane was prepared from commercially available *trans*-2-hexenol according to lit. procedure.1 To a solution of benzylidene derivative {(4*S*)-2-phenyl-4-propyl-1,3-dioxane} (2.0 g, 9.7 mmol) in anhydrous CH2Cl2 (20 mL) at 0 °C, DIBAL-H (15 mL, 19.4 mmol, 2 M solution in toluene) was added drop wise and stirred for 1 h at room temperature. MeOH (3 mL), followed by saturated aq. sodium potassium tartrate solution (4 mL) were added to the reaction mixture, filtered through a pad of celite and washed with EtOAc (40 mL). The organic layers were dried (Na2SO4), evaporated and the residue was purified by silica gel column chromatography (85:15, hexane/EtOAc) to afford compound 5 (1.9 g, 95% yield) as a light yellow liquid. [α]D25 = +25.8 (*c* 0.4, CHCl3). 1H NMR (500 MHz, CDCl3): δ 7.37-7.26 (m, 5H), 4.59 (d, *J* = 11.4 Hz, 1H), 4.48 (d, *J* = 11.4 Hz, 1H), 3.80-3.69 (m, 2H), 3.67-3.62 (m, 1H), 1.88-1.60 (m, 3H), 1.56-1.47 (m, 1H), 1.43-1.32 (m, 2H), 0.93 (t, *J* = 7.3 Hz, 1H).13C NMR (100 MHz, CDCl3): δ 138.4, 128.5, 127.8, 127.7, 127.0, 78.4, 70.9, 60.8, 35.8, 35.7, 18.4, 14.3. HRMS *m/z*: calcd for C13H21O2 [M+H]+ 209.15361 found: 209.15387.

**(6*S*)-6-(Benzyloxy)non-1-yn-4-ol (6)**

Compound **5** (1.6 g, 7.7 mmol) was dissolved in anhydrous CH2Cl2 (20 mL), cooled to 0 °C and Dess-Martin periodinane (3.2 g, 7.7mmol) was added and the resultant mixture was stirred at room temperature for 2 hours. The reaction was quenched with 10% aqueous sodium thiosulfate (20 mL) and saturated aqueous sodium bicarbonate (20 mL), stirred for 10 min, separated, concentrated to provide the aldehyde (1.6 g, 95%) as a yellow oil.

To a stirred suspension on zinc powder (1.5 g, 23.3 mmol) in THF (10 mL) at 0 °C was added propargyl bromide (1.4 mL, 15.2 mmol). The mixture was stirred for 1.5 h, and then a solution of aldehyde (1.6 g, 7.6 mmol) in THF (6 mL) was added drop wise. The resultant mixture was stirred at 0 °C for 15 min, and then the reaction was quenched with sat. aq. NH4Cl (2 mL). The solid residue was removed by filtration, and 2 M HCl (5 mL) was added to the filtrate. The filtrate was extracted with EtOAc (3 x 15 mL), and the combined organic extracts were washed with sat. aq NaCl (15 mL), dried over Na2SO4, and concentrated in *vacuo*. The residue was purified by silica gel column chromatography (90:10, hexane/EtOAc) to afford a diastereomeric mixture of **6** (1.5 g, 85%, dr = 3:2) as a yellow oil. 1H NMR (400 MHz, CDCl3): δ 7.38-7.30 (m, 5H), 4.60 (dd, *J* = 22.0, 11.2 Hz, 1H), 4.49 (dd, *J* = 32.2, 11.1Hz, 1H), 4.12-4.03 (m, 0.6H), 3.99-3.90 (m, 0.4H), 3.78-3.71 (m, 1H), 2.39-2.31 (m, 2H), 2.03 (t, *J* = 2.6 Hz, 0.6H), 2.01 (t, *J* = 2.6 Hz, 0.4H), 1.86-1.58 (m, 4H), 1.43-1.32 (m, 2H), 0.93 (t, *J* = 7.3 Hz, 3H). 13C NMR (100 MHz, CDCl3): δ 138.2, 137.8, 128.5, 128.4, 127.8, 127.7, 80.9, 79.4, 71.2, 70.5, 70.4, 70.2, 69.9, 67.0, 39.6, 38.7, 35.5, 27.3, 27.1, 18.6, 17.8, 14.2, 14.1. HRMS *m/z*: calcd for C16H23O2 [M+H]+ 247.16926 found: 247.16942.

**(((4*S*,6*S*)-Non-1-yne-4,6-diylbis(oxy))bis(methylene))dibenzene (4a)**

NaH (60% in mineral oil, 0.35 g, 14.6 mmol) was washed twice with hexanes and dried in *vacuo*. To a stirred solution of NaH in THF (12 mL) at 0 °C was added a solution of **6** (1.2 g, 4.8 mmol) in THF (5.0 mL). The mixture was stirred for 40 min, and then BnBr (1.1 mL, 9.6 mmol) was added drop wise followed by TBAI (0.180 g, 0.50 mmol). The resultant mixture was heated to 60 °C and stirred for 1 h. The mixture was then cooled to 0 °C, and the reaction was quenched by the addition of water (5 mL) and EtOAc. The organic layer was separated, and then the aqueous layer was further extracted with EtOAc (2 x 20 mL). The combined organic extracts were washed with sat. aq. NaCl, dried over Na2SO4 and concentrated in *vacuo*. The residue was purified by silica gel column chromatography (95:5, hexane/EtOAc) to afford **4a** (0.88 g, 54%) and **4b** (0.59 g, 36%) as pale yellow oils:

**(((4*S*,6*S*)-Non-1-yne-4,6-diylbis(oxy))bis(methylene))dibenzene** (**4a)**:

[α]D25 = +29.5 (*c* 0.4, CHCl3). 1H NMR (400 MHz, CDCl3): δ 7.37-7.26 (m, 10H), 4.64 (d, *J* = 11.4 Hz, 1H), 4.53 (d, *J* = 11.4 Hz, 1H), 4.32 (dd, *J* = 24.6, 11.4 Hz, 2H), 3.81 (td, *J* = 9.2, 5.1 Hz, 1H), 3.67 (td, *J* = 9.4, 5.3 Hz, 1H), 2.47 (dd, *J* = 5.5, 2.5 Hz, 2H), 2.02 (t, *J* = 2.6 Hz, 1H), 1.83-1.77 (m, 2H), 1.65-1.57 (m, 1H), 1.55-1.47 (m, 1H), 1.40 (dt, *J* = 15.0, 7.4 Hz, 2H), 0.92 (t, *J* = 7.3 Hz, 3H). 13C NMR (100 MHz, CDCl3): δ 139.0, 138.4, 128.3, 128.3, 127.9, 127.8, 127.6, 127.4, 81.0, 75.3, 74.0, 71.5, 70.8, 70.3, 40.0, 36.3, 24.1, 18.2, 14.4. IR (neat) *ν*max 3300, 2927, 2866, 1728, 1456, 1095 cm-1. HRMS *m/z*: calcd for C23H28O2Na [M+Na]+ 359.19815 found: 359.19831.

**(((4*R*,6*S*)-Non-1-yne-4,6-diylbis(oxy))bis(methylene))dibenzene (4b)**

1H NMR (500 MHz, CDCl3): δ 7.33-7.26 (m, 10H), 4.64 (d, *J* = 11.7 Hz, 1H), 4.49 (d, *J* = 6.2 Hz, 1H), 4.48 (d, *J* = 5.3, 2H), 3.70-3.65 (m, 1H), 3.56-3.50 (m, 1H), 2.46-2.43 (m, 2H), 2.01 (t, *J* = 2.7 Hz, 1H), 1.88-1.82 (m, 2H), 1.55-1.27 (m, 4H), 0.87 (t, *J* = 7.3 Hz, 3H). 13C NMR (100 MHz, CDCl3): δ 138.8, 138.2, 128.3, 128.2, 127.8, 127.7, 127.6, 127.4, 80.9, 75.6, 74.0, 71.0, 70.4, 70.2, 38.1, 36.1, 23.7, 18.4, 14.1. EI-ESI *m/z*: calcd for C23H28O2Na[M+Na]+ 336.

**(4*S*,6*S*)-2,2-Dimethyl-4-(prop-2-yn-1-yl)-6-propyl-1,3-dioxane (7a)**

Compound **4a** (0.200 g, 0.6 mmol) was dissolved in anhydrous CH2Cl2 (6 mL), cooled to 0 °C and TiCl4 (1.2 mL, 1.2 mmol, 1 M in CH2Cl2) was added the resultant mixture was stirred at room temperature for 4 h. After completion of the reaction (monitored by TLC), it was quenched with a saturated solution of NaHCO3 (10 mL). The organic phase was separated and the aqueous phase extracted with ethyl acetate (5 x 15 mL). The combined organic layers were dried over anhydrous Na2SO4 and concentrated under reduced pressure, and then the residue was purified by silica gel column chromatography (85:15, hexane/EtOAc) to afford compound diol **(**0.08 g, 95%) as a yellow oil.

To a solution of diol (0.08 g, 0.5 mmol) in anhydrous CH2Cl2 (10 mL), 2,2-DMP (1.32 mL, 2.16 mmol) and a catalytic amount of *p*-TSA were added. The mixture was stirred at ambient temperature for 2 h. After completion of the reaction, solid NaHCO3 was added to neutralize the *p*-TSA. The solvent was removed in *vacuo* and the residue was purified by silica gel column chromatography (95:5, hexane/EtOAc) to afford the pure acetonide compound (0.08 g, 80%) as a light yellow liquid.[α]D25 = -25.5 (*c* 0.2, CHCl3). 1H NMR (500 MHz, CDCl3): δ 4.01-3.93 (m, 1H), 3.88-3.79 (m, 1H), 2.46 (dd, *J* = 2.6, 7.7 Hz,1H), 2.26 (dd, *J* = 2.6, 7.7 Hz, 1H), 2.00 (t, *J* = 2.6, Hz, 1H), 1.75-1.60 (m, 2H), 1.45-1.30 (m, 4H), 1.44 (s, 6H), 0.91 (t, *J* = 6.9 Hz, 3H). 13C NMR (100 MHz, CDCl3):  100.4, 80.6, 69.7, 66.3, 65.3, 37.9, 37.6, 25.6, 24.9, 24.7, 18.5, 13.9. EI-ESI *m/z*: calcd for C12H20O2Na[M+Na]+ 219.

**(4*R*,6*S*)-2,2-Dimethyl-4-(prop-2-yn-1-yl)-6-propyl-1,3-dioxane (7b)**

[α]D25 = +10.5 (*c* 0.3, CHCl3). 1H NMR (400 MHz, CDCl3): δ 3.99-3.96 (m, 1H), 3.84-3.83 (m, 1H), 2.46 (dd, *J* = 2.6, 7.7 Hz, 1H), 2.27 (dd, *J* = 2.6, 7.9 Hz, 1H), 2.08 (t, *J* = 2.6 Hz, 1H), 1.76 (m, 1H), 1.6-1.2 (m, 11H), 0.91 (t, *J* = 6.9 Hz, 3H). 13C NMR (100 MHz, CDCl3):  98.7, 80.4, 70.2, 68.6, 67.8, 38.5, 36.1, 30.1, 26.3, 19.8, 18.1, 14.0. EI-ESI *m/z*: calcd for C12H20O2Na[M+Na]+ 219.

**7-(Benzyloxy)-2,2-dimethyl-4-oxo-4H-benzo[d][1,3]dioxin-5-yl trifluoro-methanesulfonate (3)**

Compound **3** was prepared from commercially available 2,4,6 tri hydroxyl benzoic acid according to lit. procedure.2Mp: 87-90 oC. 1H NMR (500 MHz, CDCl3): δ 7.46-7.36 (m, 5H), 6.61 (d, *J* = 2.2 Hz, 1H), 6.56 (d, *J* = 2.3 Hz, 1H), 5.10 (s, 2H), 1.74 (s, 6H). 13C NMR (125 MHz, CDCl3): δ 164.6, 158.8, 157.0, 149.9, 134.6, 128.9, 128.8, 127.7, 117.5, 106.6, 105.8, 102.0, 101.2, 71.2, 25.5. HRMS *m/z*: calcd for C18H15O7F3NaS[M+Na]+ 455. 03828 found: 455. 03811.

**7-(Benzyloxy)-5-((4*S*,6*S*)-4,6-bis(benzyloxy)non-1-yn-1-yl)-2,2-dimethyl-4H-benzo[d][1,3]dioxin-4-one (2)**

CuI (0.03 g, 0.19 mmol), diethylamine (0.54 mL, 3.8 mmol), PdCl2(PPh3)2 (0.067 g, 0.09 mmol), and **3** (0.82 g, 1.9 mmol) were added to a solution of **4a** (0.64 g, 1.9 mmol) in anhydrous acetonitrile (10 mL) under Nitrogen atmosphere and the mixture was allowed to stir at 70 ºC for 30 min. H2O (5 mL) was added and the mixture was extracted with ethyl acetate (3 x 5 mL) and the combined organic solution was washed with saturated aqueous NaCl (5 mL) solution, dried over anhydrous NaSO4, and the solvent was evaporated under reduced pressure. The residue was purified by silica gel column chromatography (90:10 hexane/EtOAc) to afford compound **2** (0.82 g, 70%) as a yellow oil liquid; [α]D25**=** +40.0 (*c* 0.2, CHCl3). 1H NMR (400 MHz, CDCl3): δ 7.41- 7.28 (m, 15H), 6.82 (d, *J* = 2.5 Hz, 1H), 6.44 (d, *J* = 2.4 Hz, 1H), 5.02 (s, 1H), 4.74 (d, *J* = 11.5 Hz, 1H), 4.53 (d, *J* = 11.4 Hz, 1H), 4.44 (d, *J* = 11.4 Hz, 1H), 4.34 (d, *J* = 11.4 Hz, 1H), 3.99-3.91 (m, 1H), 3.75-3.67 (m, 1H), 2.77 (dd, *J* = 20.1, 9.3 Hz, 2H), 1.97 (ddd, *J* = 14.5, 9.3, 2.9 Hz, 1H), 1.85 (ddd, *J* = 14.5, 9.5, 3.1 Hz, 1H), 1.68 (s, 6H), 1.63-1.55 (m, 2H), 1.48-1.37 (m, 2H), 0.91 (t, *J* = 7.3 Hz, 3H). 13C NMR (125 MHz, CDCl3):  163.5, 158.7, 158.1, 139.0, 138.6, 135.5, 128.7, 128.3, 128.2, 128.2, 127.9, 127.7, 127.5, 127.3, 116.3, 105.4, 102.5, 94.5, 80.2, 75.5, 74.5, 71.6, 70.6, 70.3, 60.3, 40.3, 36.4, 29.6, 25.8, 25.6, 18.3, 14.3. IR (neat) *ν*max 3031, 2926, 2866, 2235, 1740, 1601, 1573, 1276, 1170 cm−1. HRMS *m/z*: calcd for C40H42O6Na [M+Na]+ 641.28736 found: 641.28763.

**6-(Benzyloxy)-3-((2*R*,4*S*)-2,4-bis(benzyloxy)heptyl)-8-hydroxy-1H-isochromen-1-one (8)**

Trifliuoromethanesulfonic acid (0.02 mL, 0.3 mmol) was added to a solution of **2** (0.200 g, 0.3 mmol) in THF (5 mL) at room temperature and the mixture was refluxed for 7 h. The reaction mixture was poured to ice-water and neutralized with saturated aqueous NaHCO3. The aqueous solution was extracted with ethyl acetate (3 x 5 mL) and the combined organic solution was washed with saturated aqueous NaCl solution, dried over anhydrous MgSO4, and the solution was concentrated under reduced pressure. The residue was purified by silica gel column chromatography (92:8, hexane/EtOAc) to afford compound **8** (0.16 g, 90%) as a yellow oil; [α]D25**=** +15.0 (*c* 0.1, CHCl3). 1H NMR (500 MHz, CDCl3): δ 11.09 (s, 1H), 7.43-7.29 (m, 10H), 7.25-7.18 (m, 5H), 6.54 (d, *J* = 2.3 Hz, 1H), 6.33 (d, *J* = 2.3 Hz, 1H), 6.20 (s, 1H), 5.12 (s, 2H), 4.54 (d, *J* = 11.4 Hz, 1H), 4.48 (d, *J* = 11.4 Hz, 1H), 4.37 (d, *J* = 11.4 Hz, 1H), 4.30 (d, *J* = 11.4 Hz, 1H), 4.06-3.99 (m, 1H), 3.67-3.60 (m, 1H), 2.73 (dd, *J* = 14.7, 6.3 Hz, 1H), 2.67 (dd, *J* = 14.5, 6.0 Hz, 1H), 1.74 (td, *J* = 6.1, 3.1 Hz, 2H), 1.65-1.46 (m, 2H), 1.42-1.28 (m, 2H), 0.92 (t, *J* = 7.3 Hz, 3H). 13C NMR (100 MHz, CDCl3):  166.0, 165.7, 163.5, 154.6, 139.1, 138.7, 138.1, 135.7, 128.7, 128.3, 128.3, 127.9, 127.8, 127.6, 127.5, 127.4, 106.1, 101.9, 101.1, 100.2, 75.4, 73.9, 71.9, 70.7, 70.2, 40.4, 39.0, 36.1, 29.6, 18.1, 14.3. IR (neat) *ν*max 3031, 2925, 2857, 1685, 1621, 1165, 1064 cm−1. HRMS *m/z*: calcd for C37H38O6Na [M+Na]+ 601. 25606 found: 601. 25533.

**3-((2*R*,4*S*)-2,4-Dihydroxyheptyl)-6,8-dihydroxy-1H-isochromen-1-one (1)**

To a stirred solution of **8** (0.05 g, 0.08 mmol) in CH2Cl2 (5 mL), TiCl4 (1.0 mL, 0.24 mmol, 1 M in CH2Cl2) was added at 0 °C and the reaction mixture stirred at room temperature for 4 h. After completion of the reaction (monitored by TLC), it was quenched with a saturated solution of NaHCO3 (10 mL). The organic phase was separated and the aqueous phase extracted with ethyl acetate (5 x 15 mL). The combined organic layers were dried over anhydrous Na2SO4 and concentrated under reduced pressure, and then the residue was purified by silica gel column chromatography (60:40, hexane/EtOAc) to afford compound **1** (0.02 g, 95%) as a white amorphous solid. [α]D25 = -15.0 (*c* = 0.05, MeOH), lit.3 [α]D25 = -15.6 (*c* = 0.09, MeOH). 1H NMR (500 MHz, Acetone-d6): δ 11.15 (s, 1 H), 6.43 (s, 1H), 6.40 (d, *J* = 2.2 Hz, 1 H), 6.37 (d, *J* = 2.2 Hz, 1H), 4.31 (m, 1H), 4.20 (br. s, 1H), 3.89 (m, 1H), 3.74 (br. s, 1H), 2.66 (dd, *J* = 14.4, 4.4 Hz, 1H), 2.60 (dd, *J* = 14.3, 8.0 Hz, 1H), 1.62-1.58 (m, 2H), 1.46-1.36 (m, 4H), 0.89 (t, *J* = 7.0 Hz, 3H). 13C NMR (100 MHz, Acetone-d6):  167.2, 166.5, 164.5, 156.5, 141.0, 106.5, 103.4, 102.2, 99.8, 68.3, 66.7, 44.9, 42.8, 41.2, 19.6, 14.5. IR (neat) *ν*max 3421, 2926, 2860, 1681, 1625, 1462, 1384, 1168, 845 cm-1. HRMS *m/z*: calcd for C16H20O6Na [M+Na]+ 331.11521 found: 331.11609.

1H NMR Spectrum of compound **5** in CDCl3 (500 MHz)

13C NMR Spectrum of compound **5** in CDCl3 (100 MHz)

1H NMR Spectrum of compound **6** in CDCl3 (400 MHz)

13C NMR Spectrum of compound **6** in CDCl3 (100 MHz)

1H NMR Spectrum of compound **4a** in CDCl3 (400 MHz)

13C NMR Spectrum of compound **4a** in CDCl3 (100 MHz)

1H NMR Spectrum of compound **4b** in CDCl3 (500 MHz)

13C NMR Spectrum of compound **4b** in CDCl3 (100 MHz)

1H NMR Spectrum of compound **7a** in CDCl3 (500 MHz)

13C NMR Spectrum of compound **7a** in CDCl3 (100 MHz)

1H NMR Spectrum of compound **7b** in CDCl3 (400 MHz)

13C NMR Spectrum of compound **7b** in CDCl3 (100 MHz)

1H NMR Spectrum of compound **3** in CDCl3 (500 MHz)

13C NMR Spectrum of compound **3** in CDCl3 (125 MHz)

1H NMR Spectrum of compound **2** in CDCl3 (400 MHz)

13C NMR Spectrum of compound **2** in CDCl3 (125 MHz)

1H NMR Spectrum of compound **8** in CDCl3 (500 MHz)

13C NMR Spectrum of compound **8** in CDCl3 (100 MHz)

1H NMR Spectrum of compound **1** in Acetone d6 (500 MHz)

13C NMR Spectrum of compound **1** in Acetone d6 (100 MHz)

**PRK-DM**

1.0

2.0

3.0

4.0

5.0

6.0

7.0

8.0

9.0

min

0

10

20

30

40

50

60

70

80

90

mAU

254nm4nm (1.00)

2.108

2.614

LCMS of compound **4a** isomer

**Peak table:**

| **Peak** | **Ret. Time** | **Area** | **Area%** |
| --- | --- | --- | --- |
| 1 | 2.108 | 638207 | 97.787 |
| 2 | 2.614 | 14444 | 2.213 |
| Total |  | 652651 | 100.000 |

Instrument : LCMS-2020 SHIMADZU

Software : Lab Solutions (5.41.240 Version)

Mobile Phase : Acetonitrile: Water (0.1 % formic acid) (80:20)

Flow Rate : 0.6 mL/min

Wavelength : 254 nm

Column : Waters X Bridge C18

Column Size : 4.6x50 mm

Particle Size : 3.5 µ

**References**

1. Radha Krishna, P.; Dayaker, G. *Tetrahedron Lett.,* **2007**, *48*, 7279-7282.
2. Namecek, G.; Cudaj, J.; Podlech, J. *Eur. J. Org. Chem*., **2012**, 3863-3870.
3. Li, R.; Chen, S.; Niu, S.; Guo, L.; Yin, J.; Ch, Y. *Fitoterapia* **2014**, *96*, 88-94.
